# Supplementary material for: Addition of Lymphatic Stimulating Self-Care Practices Reduces Acute Attacks among People Affected by Moderate and Severe Lower-Limb Lymphedema in Ethiopia, a Cluster Randomized Controlled Trial
Source: MDPI journal article supplement (doi:10.3390/jcm9124077), 2020-12-17
Supplement: s1 [file s1]

1. Supplementary Table 1: Lymphoedema stage by group and time

| Time     | Stage | Control (legs) | Intervention (legs) | p = <sup>a</sup> |
|----------|-------|----------------|---------------------|------------------|
| Baseline |       | n = 118        | n = 134             | 0.63             |
|          | 0     | 12 (10.5%)     | 9 (6.7%)            |                  |
|          | 1     | 5 (4.2%)       | 7 (5.2%)            |                  |
|          | 2     | 2 (1.7%)       | 1 (0.7%)            |                  |
|          | 3     | 23 (19.5%)     | 28 (20.9%)          |                  |
|          | 4     | 2 (1.7%)       | 4 (3.0%)            |                  |
|          | 5     | 0 (0.0%)       | 0 (0.0%)            |                  |
|          | 6     | 60 (50.8%)     | 60 (44.8%)          |                  |
|          | 7     | 0 (0.0%)       | 2 (1.5%)            |                  |
|          | P     | 14 (11.9%)     | 24 (17.9%)          |                  |
| 4-weeks  |       | n = 114        | n = 124             | 0.69             |
|          | 0     | 5 (4.4%)       | 7 (5.5%)            |                  |
|          | 1     | 5 (4.4%)       | 4 (3.1%)            |                  |
|          | 2     | 0 (0.0%)       | 1 (0.8%)            |                  |
|          | 3     | 42 (36.8%)     | 43 (33.6%)          |                  |
|          | 4     | 0 (0.0%)       | 1 (0.8%)            |                  |
|          | 5     |                |                     |                  |
|          | 6     | 48 (42.1%)     | 48 (37.5%)          |                  |
|          | 7     |                |                     |                  |
|          | P     | 14 (12.3%)     | 24 (18.8%)          |                  |
| 12-weeks |       | n = 112        | n = 128             | 0.012            |
|          | 0     | 5 (4.5%)       | 14 (10.8%)          |                  |
|          | 1     | 8 (7.1%)       | 2 (1.5%)            |                  |
|          | 2     | 8 (7.1%)       | 2 (1.5%)            |                  |
|          | 3     | 38 (33.9%)     | 43 (33.1%)          |                  |
|          | 4     | 0 (0.0%)       | 3 (2.3%)            |                  |
|          | 5     | 0 (0.0%)       | 0 (0.0%)            |                  |
|          | 6     | 39 (34.8%)     | 42 (32.3%)          |                  |
|          | 7     | 0 (0.0%)       | 0 (0.0%)            |                  |
|          | P     | 14 (12.5%)     | 24 (18.5%)          |                  |
| 24-weeks |       | n = 116        | n = 110             | 0.36             |
|          | 0     | 10 (8.6%)      | 9 (7.8%)            |                  |
|          | 1     | 6 (5.2%)       | 5 (4.3%)            |                  |
|          | 2     | 1 (0.9%)       | 4 (3.4%)            |                  |
|          | 3     | 62 (53.4%)     | 55 (47.4%)          |                  |
|          | 4     | 0 (0.0%)       | 0 (0.0%)            |                  |
|          | 5     | 0 (0.0%)       | 1 (0.9%)            |                  |
|          | 6     | 23 (19.8%)     | 18 (15.5%)          |                  |
|          | 7     | 0 (0.0%)       | 0 (0.0%)            |                  |
|          | P     | 14 (12.1%)     | 24 (20.7%)          |                  |

a) p-values calculated using Fisher's exact test

2. Supplementary Table 2: Mid-calf circumference in centimetres

| <b>Time</b> |              | <b>Stage 0</b> | <b>Stage P</b> | <b>Moderate</b> | <b>Severe</b> |
|-------------|--------------|----------------|----------------|-----------------|---------------|
| Baseline    | Control      | 25.2           | 25.9           | 26.6            | 28.5          |
|             | Intervention | 25.2           | 24.6           | 27.9            | 29.0          |
| 4-weeks     | Control      | 23.1           | 25.8           | 27.0            | 28.9          |
|             | Intervention | 24.3           | 25.1           | 27.2            | 29.0          |
| 12-weeks    | Control      | 24.4           | 26.4           | 26.8            | 29.5          |
|             | Intervention | 24.4           | 24.5           | 27.5            | 29.2          |
| 24-weeks    | Control      | 23.4           | 26.5           | 27.1            | 30.1          |
|             | Intervention | 24.7           | 24.6           | 28.3            | 29.4          |

3. Supplementary table 3: Mid-calf Indurometer score, mean (SD).

| Time     |              | Stage 0     | Stage P     | Moderate                 | Severe                   |
|----------|--------------|-------------|-------------|--------------------------|--------------------------|
| Baseline | Control      | 3.21 (0.69) | 3.23 (0.54) | 3.16 (0.55)              | 3.21 (0.61)              |
|          | Intervention | 3.49 (0.91) | 2.73 (0.83) | 3.16 (0.80)              | 2.91 (0.66) <sup>1</sup> |
| 4-weeks  | Control      | 2.78 (1.10) | 2.97 (0.32) | 2.81 (0.48)              | 2.94 (0.58)              |
|          | Intervention | 2.26 (0.24) | 2.61 (0.66) | 2.81 (0.65)              | 2.58 (0.67) <sup>2</sup> |
| 12-weeks | Control      | 2.54 (0.69) | 2.76 (0.32) | 2.43 (0.62)              | 2.37 (0.59)              |
|          | Intervention | 2.48 (0.73) | 2.62 (0.59) | 2.75 (0.85) <sup>3</sup> | 2.76 (0.83) <sup>4</sup> |
| 24-weeks | Control      | 2.34 (0.60) | 2.54 (0.65) | 2.59 (0.66)              | 2.40 (0.73)              |
|          | Intervention | 2.35 (0.57) | 2.47 (0.67) | 2.52 (0.60)              | 2.42 (0.56)              |

*Between group comparison – 1.  $p = 0.014$ , 2.  $p = 0.008$ , 3.  $P = 0.053$ , 4.  $p = 0.023$*

*p-values are calculated using two sample t-test.*

4. Supplementary Table 4: Frequency and duration of acute attacks and working days lost

|                                             | Time       | Control       | Intervention  | p =   |
|---------------------------------------------|------------|---------------|---------------|-------|
| <b>Acute attacks previous one-month</b>     |            |               |               |       |
| Frequency = 0 attacks, n = (%)              | Baseline   | 23 (39%)      | 29 (44%)      | 0.68  |
|                                             | 24-weeks   | 48 (83%)      | 52 (95%)      | 0.088 |
| Frequency, median (IQR)                     | Baseline   | 1 (0, 1)      | 1 (0, 1)      | 0.48  |
|                                             | 24-weeks   | 0 (0, 0)      | 0 (0, 0)      | 0.056 |
| Frequency, mean (SD)                        | Baseline   | 0.78 (0.74)   | 0.70 (0.74)   | 0.54  |
|                                             | 24-weeks   | 0.19 (0.44)   | 0.22 (1.36)   | 0.88  |
| Duration, median days (IQR)                 | Baseline   | 3 (0, 3)      | 3 (0, 3)      | 0.36  |
|                                             | 24-weeks * | 0 (0, 0)      | 0 (0, 0)      | 0.046 |
| Duration, mean days (SD)                    | Baseline   | 2.64 (3.02)   | 2.18 (2.60)   | 0.36  |
|                                             | 24-weeks   | .67 (1.60)    | 0.2 (1.01)    | 0.065 |
| <b>Acute attacks previous 6-months</b>      |            |               |               |       |
| Frequency = 0 attacks, n = (%)              | Baseline   | 7 (13%)       | 4 (8%)        | 0.22  |
|                                             | 24-weeks * | 36 (62%)      | 49 (88%)      | 0.014 |
| Frequency, median (IQR)                     | Baseline   | 3 (1, 5)      | 3 (1, 4)      | 0.74  |
|                                             | 24-weeks * | 0 (0, 1)      | 0 (0, 0)      | 0.002 |
| Frequency, mean (SD)                        | Baseline   | 3.43(4.85)    | 3.2 (2.71)    | 0.76  |
|                                             | 24-weeks   | 0.79 (1.55)   | 0.38 (1.48)   | 0.14  |
| Duration, median days (IQR)                 | Baseline * | 4 (3, 5)      | 3 (3, 4)      | 0.023 |
|                                             | 24-weeks * | 0 (0, 3)      | 0 (0, 0)      | 0.001 |
| Duration, mean days (SD)                    | Baseline * | 5.72 (6.78)   | 3.45 (1.60)   | 0.024 |
|                                             | 24-weeks * | 1.57 (2.56)   | 0.45 (1.43)   | 0.005 |
| <b>Lost working days previous one-month</b> |            |               |               |       |
| Days = 0 days, n = (%)                      | Baseline   | 21 (36%)      | 32 (48%)      | 0.34  |
|                                             | 24-weeks   | 48 (83%)      | 52 (95%)      | 0.13  |
| Days, median (IQR)                          | Baseline   | 3 (0, 6)      | 1.5 (0, 4)    | 0.22  |
|                                             | 24-weeks   | 0 (0, 0)      | 0 (0, 0)      | 0.057 |
| Days, mean (SD)                             | Baseline   | 3.46 (4.04)   | 3 (4.9)       | 0.57  |
|                                             | 24-weeks   | 0.78 (1.85)   | 0.71 (4.14)   | 0.91  |
| <b>Lost working days previous 6-months</b>  |            |               |               |       |
| Frequency = 0 days, n = (%)                 | Baseline   | 10 (17%)      | 17 (25%)      | 0.57  |
|                                             | 24-weeks   | 36 (62%)      | 47 (84%)      | 0.24  |
| Frequency, median (IQR)                     | Baseline   | 10 (4, 20)    | 7 (0, 15)     | 0.17  |
|                                             | 24-weeks*  | 0 (0, 5)      | 0 (0, 0)      | 0.009 |
| Frequency, mean (SD)                        | Baseline   | 13.58 (13.47) | 12.12 (22.72) | 0.67  |
|                                             | 24-weeks   | 3.47 (6.13)   | 1.95 (8.26)   | 0.27  |

\* Significant between group differences
